# Supplementary material for: Dissection of Functional Domains of Orc1-2, the Archaeal Global DNA Damage-Responsive Regulator
Source: MDPI journal article supplement (doi:10.3390/ijms232314609), 2022-11-23
Supplement: s1 [file s1]

## *Supplementary Material*

### 1. Supplementary Tables

**Supplementary Table S1. Strains and plasmids used in this study**

| Strains         | Genotype                                                                                                                   | Source                          |
|-----------------|----------------------------------------------------------------------------------------------------------------------------|---------------------------------|
| E233S           | $\Delta pyrEF\Delta lacS$                                                                                                  | Deng <i>et al.</i> , 2009 [1]   |
| $\Delta orc1-2$ | $\Delta pyrEF\Delta lacS\Delta orc1-2$                                                                                     | Samson <i>et al.</i> , 2013 [2] |
| $\Delta N$      | $\Delta pyrEF\Delta lacS$ , carrying the deletion of Orc1-2 N-terminus ATPase domain (1-298 amino acids) coding sequence   | This work                       |
| $\Delta C$      | $\Delta pyrEF\Delta lacS$ , carrying the deletion of Orc1-2 C-terminus WH domain (299-413 amino acids) coding sequence     | This work                       |
| WA              | $\Delta pyrEF\Delta lacS$ , carrying K72A mutation in the <i>orc1-2</i> gene                                               | This work                       |
| ISM             | $\Delta pyrEF\Delta lacS$ , carrying G127D and L128D mutations in the <i>orc1-2</i> gene                                   | This work                       |
| wH-m1           | $\Delta pyrEF\Delta lacS$ , carrying R353A and R354A mutations in the <i>orc1-2</i> gene                                   | This work                       |
| wH-m2           | $\Delta pyrEF\Delta lacS$ , carrying R381A and R383A mutations in the <i>orc1-2</i> gene                                   | This work                       |
| wH              | $\Delta pyrEF\Delta lacS$ , carrying R353A, R354A, R381A and R383A quadruple mutations in the <i>orc1-2</i> gene           | This work                       |
| WBwH            | $\Delta pyrEF\Delta lacS$ , carrying E154A, R353A, R354A, R381A and R383A pentuple substitutions in the <i>orc1-2</i> gene | This work                       |

| Plasmids                                                   | Features                                                                                                                                                                          |                               |
|------------------------------------------------------------|-----------------------------------------------------------------------------------------------------------------------------------------------------------------------------------|-------------------------------|
| pSe-Rp                                                     | The plasmid contains a DNA fragment of two tandem copies of CRISPR repeat sequences for the construction of the artificial mini-CRISPR loci                                       | Peng <i>et al.</i> , 2015 [3] |
| pSeSD                                                      | A <i>Saccharolobus-E. coli</i> shuttle vector carrying an expression cassette controlled under a synthetic strong promoter ParaS-SD                                               | Peng <i>et al.</i> , 2012 [4] |
| pAC- <i>orc1</i> -2ΔN, ΔC, WA, ISM, wH-m1, wH-m2, wH, WBwH | pSe-Rp carrying a spacer matching to the protospacer in the corresponding mutation site of <i>orc1</i> -2 gene in genome                                                          | This work                     |
| pGE- <i>orc1</i> -2ΔN, ΔC, WA, ISM, wH-m1, wH-m2, wH, WBwH | The genome-editing plasmid derived from pAC- <i>orc1</i> -2ΔN, ΔC, WA, ISM, WHM1, WHM2, WHD, WB-WHD respectively, with the corresponding donor DNA inserted between SalI and NotI | This work                     |
| P38-WT                                                     | Derived from pSeSD, carrying Orc1-2 coding sequence which is controlled under a weak promoter ParaS38 [5]                                                                         | This work                     |
| P38-E154A                                                  | Derived from pSeSD, carrying Orc1-2 E154A mutant coding sequence which is controlled under a weak promoter ParaS38                                                                | This work                     |

**Supplementary Table S2. Oligos used in this study**

| Oligos                                       | Sequence*                                      |
|----------------------------------------------|------------------------------------------------|
| <b>Construction of <i>orc1-2</i> mutants</b> |                                                |
| ΔN-SpF                                       | AAAGTTCTATTTATAAATTAGATAGAAGTATAAGGGATCATATA   |
| ΔN-SpR                                       | TAGCTATATGATCCCTTATACTTCTATCTAATTTATAAATAGAA   |
| ΔN-SalIF                                     | ACGCGT <u>TCGAC</u> CCATTTCAATCGATTATA         |
| ΔN-NotIR                                     | ATAAGAAT <u>GCGGCCG</u> CATAATATCTTCATTTTAG    |
| ΔN-SOEF                                      | GATTGGGGTAAAAGTTATGATTCAAGAGATTGTGGAT          |
| ΔN-SOER                                      | ATCCACAATCTCTTGAATCATAACTTTTACCCCAATC          |
| ΔN-checkF                                    | ACCCATTAGTAATTTATGGTCT                         |
| ΔC-SpF                                       | AAAGTAGAAGAGGAATATATATCATTAGCCAGAGAGTTTAATGA   |
| ΔC-SpR                                       | TAGCTCATTAAACTCTCTGGCTAATGATATATATTCCTCTTCTA   |
| ΔC-SalIF                                     | ACGCGT <u>TCGAC</u> ACTTCTTAGTAAGATTGT         |
| ΔC-NotIR                                     | ATAAGAAT <u>GCGGCCG</u> CGCAATCACGTTCCCCCTTCTC |
| ΔC-SOEF                                      | TACAATAAATCCAGAGTAATCTATAATTCATCTAAAA          |
| ΔC-SOER                                      | TTTATAGATGAATTATAGATTACTCTGGATTATTGTA          |
| WA-SpF                                       | AAAGTTTTCCAGTACCTGTCCTACCTACTATTACAACCTCTTC    |
| WA-SpR                                       | TAGCGAAAGAGTTGTAATAGTAGGTAGGACAGGTACTGGGAAAA   |
| WA-SalIF                                     | ACGCGT <u>TCGAC</u> CCATTTCAATCGATTATA         |
| WA-NotIR                                     | ATAAGAAT <u>GCGGCCG</u> CGCATTACCATTACCCCCT    |

|            |                                               |
|------------|-----------------------------------------------|
| WA-SOEF    | ACTGGAGCCACCGCAACTGTTAGATTGTTT                |
| WA-SOER    | AGTTGCGGTGGCTCCAGTACCTGTCCTACCTAC             |
| WA-checkR  | ATCTAACAGTTGCGGTGGCT                          |
| WB-SpF     | AAAG ATCTAATGCAACTATTAGATGTATATTTCTCCTATCTAAA |
| WB-SpR     | TAGCTTTAGATAGGAGAAATATACATCTAATAGTTGCATTAGAT  |
| WB-SalIF   | ACGCGT <u>CGAC</u> CCATTTCAATCGATTATA         |
| WB-NotIR   | ATAAGAAT <u>GCGGCCGCGC</u> ATTACCATTACCCCCT   |
| WB-SOEF    | TTGGACGCTTTTGGACATTTCTGAAT                    |
| WB-SOER    | ATGTCCAAAAGCGTCCAATGCAACTATTAGATGTAT          |
| WB-checkF  | CTAATAGTTGCATTGGACGCT                         |
| ISM-SpF    | AAAGAGGGGATTATCAGCACAAAGAAGTATTTAAGATTATCCATG |
| ISM-SpR    | TAGCCATGGATAATCTTAAATACTTCTTGTGCTGATAATCCCCT  |
| ISM-SalIF  | ACGCGT <u>CGACA</u> AAGGATATACTTTCAGAT        |
| ISM-NotIR  | ATAAGAAT <u>GCGGCCGCGC</u> ATTACCATTACCCCCT   |
| ISM-SOEF   | CCGAGCCGAGACGACTCAGCACAAAGAAGTATTTAAGAT       |
| ISM-SOER   | TGAGTCGTCTCGGCTCGGTATTGGTAGTTTAAACGCGT        |
| ISM-checkF | CCAATACCGAGCCGAGACGAC                         |
| wHm1-SpF   | AAAGTCTAGGTTCTCATTAAACTCTCTGGCTAATGATATATAT   |
| wHm1-SpR   | TAGCATATATATCATTAGCCAGAGAGTTTAATGAGGAACCTAGA  |
| wHm1-SalIF | ACGCGT <u>CGACA</u> CTTCTTAGTAAGATTGT         |

|                                 |                                                 |
|---------------------------------|-------------------------------------------------|
| wHm1-NotIR                      | ATAAGAAT <u>GCGGCCG</u> CGCAATCACGTTCCCCTTCTC   |
| wHm1-SOEF                       | GAACCTGCTGCTCATACACAAGTTTATGAGTATCTG            |
| wHm1-SOER                       | TGTATGAGCAGCAGGTTCCCTCATTAAACTCTCTGGC           |
| wHm1-checkR                     | TAAACTTGTGTATGAGCAGC                            |
| wHm2-SpF                        | AAAGTCCTCTCATTCCTTCCCCTCTGCCTAGTATTAATTATC      |
| wHm2-SpR                        | TAGCGATAATTAATACTAGGCAGAGTGGAAGGGAATGAGAGGA     |
| wHm2-SalIF                      | ACGCGTCGACACTTCTTAGTAAGATTGT                    |
| wHm2-NotIR                      | ATAAGAAT <u>GCGGCCG</u> CGCAATCACGTTCCCCTTCTC   |
| wHm2-SOEF                       | GGAATGGCTGGAGCTACGACTCTAGTTTCCCTTTCT            |
| wHm2-SOER                       | AGTCGTAGCTCCAGCCATTCCCTTCCCCTCTGCCT             |
| wHm2-checkR                     | ACTAGAGTCGTAGCTCCAGC                            |
| <b>Overexpression of Orc1-2</b> |                                                 |
| Orc1-2-NdeIF                    | GAAGGAGATATACATATGTTGGTTTCAGCTAAGGATAT          |
| Orc1-2-NotIR                    | GTGCTCGAGT <u>GCGGCCG</u> CAGCCTTCGATTTTAACCTCA |
| Orc1-2ΔN-NdeIF                  | GGTAAACATATGATTCAAGAGATTGTGGAT                  |
| Orc1-2ΔC-NotIR                  | ATT <u>GCGGCCG</u> CCTCTGGATTTATTGTAGA          |
| Orc1-2WA-SOEF                   | ACAGGTACTGGGGCAACAGCAACTGT                      |
| Orc1-2WA-SOER                   | ACAGTTGCTGTTGCCCCAGTACCTGT                      |
| Orc1-2WB-SOEF                   | GTTGCATTAGATGCGTTTGGACATTTC                     |
| Orc1-2WB-SOER                   | GAAATGTCCAAACGCATCTAATGCAAC                     |

|                 |                                                         |
|-----------------|---------------------------------------------------------|
| Orc1-2ISM-SOEF  | CCGTCGAGGGACGACTCAGCACAAGAAGTATTTAAGAT                  |
| Orc1-2ISM-SOER  | TGAGTCGTCCCTCGACGGTATTGGTAGTTTTAACGCGT                  |
| Orc1-2wHm1-SOEF | GAACCTGCCGCCCATAACACAAGTTTATGAGTATCTG                   |
| Orc1-2wHm1-SOER | TGTATGGGCGGCAGGTTTCCTCATTAAACTCTCTGGC                   |
| Orc1-2wHm2-SOEF | GGAATGGCCGGAGCCACGACTCTAGTTTCCCTTTCT                    |
| Orc1-2wHm2-SOER | AGTCGTGGCTCCGGCCATTCCCTTCCCCTCTGCCT                     |
| <b>EMSA</b>     |                                                         |
| orc1-2pF        | TTTGAGAAAGAATCAAGAAAAGTTTCGGACTACTCTCTTAGATAAA          |
| orc1-2pR        | TTTATCTAAGAGAGTAGTCCGAAACTTTTCTTGATTCTTTCTCAAA          |
| upsEpF          | CTATAAAGGAAGTTTTAAGT <u>AATTT</u> CGGTATTGTGTGAGTATATTT |
| upsEpR          | AAATATACTCACACAATACCG <u>AAATT</u> ACTTAAAACTTCCTTTATAG |
| upsEpmutF       | CTATAAAGGAAGTTTTAAGTCCGGGAGGTATTGTGTGAGTATATTT          |
| upsEpmutR       | AAATATACTCACACAATACCTCCCGGACTTAAAACTTCCTTTATAG          |

**\*The restriction sites are underlined and the DNA damage response elements (DDRE) are double-underlined.**

## 2. Supplementary Figures

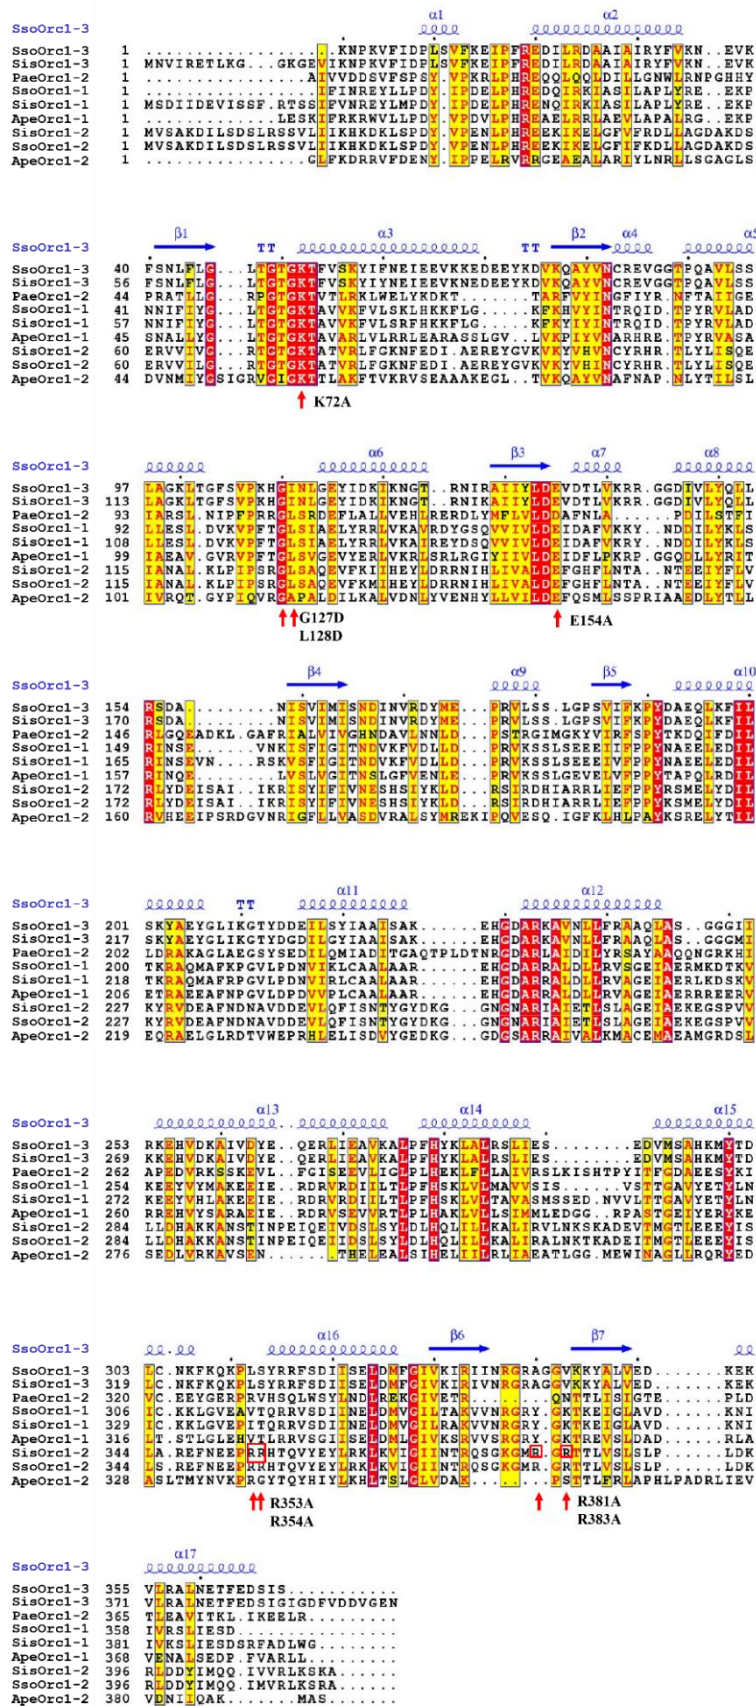

**Supplementary Figure S1. Structure-based sequence alignments of selected ORC1 proteins.**

Both Orc1 initiators (Orc1-1, Orc1-3) and Orc1 non-initiators (Orc1-2) proteins are included. Orc1 proteins are named with abbreviations of their names of genus and species, which are followed by their Orc name. Sso, *Saccharolobus solfataricus*; Sis, *Saccharolobus islandicus*; Pae, *Pyrobaculum aerophilum*; Ape, *Aeropyrum pernix*. The different secondary structure elements shown are alpha helices as large squiggles labelled ( $\alpha$ ), beta strands as arrows ( $\beta$ ), and beta turns (TT). Identical residues are shown in white on red background, and conserved residues in red. The representative Orc1 structures are SsoOrc1-3. This figure was generated with ESPript.



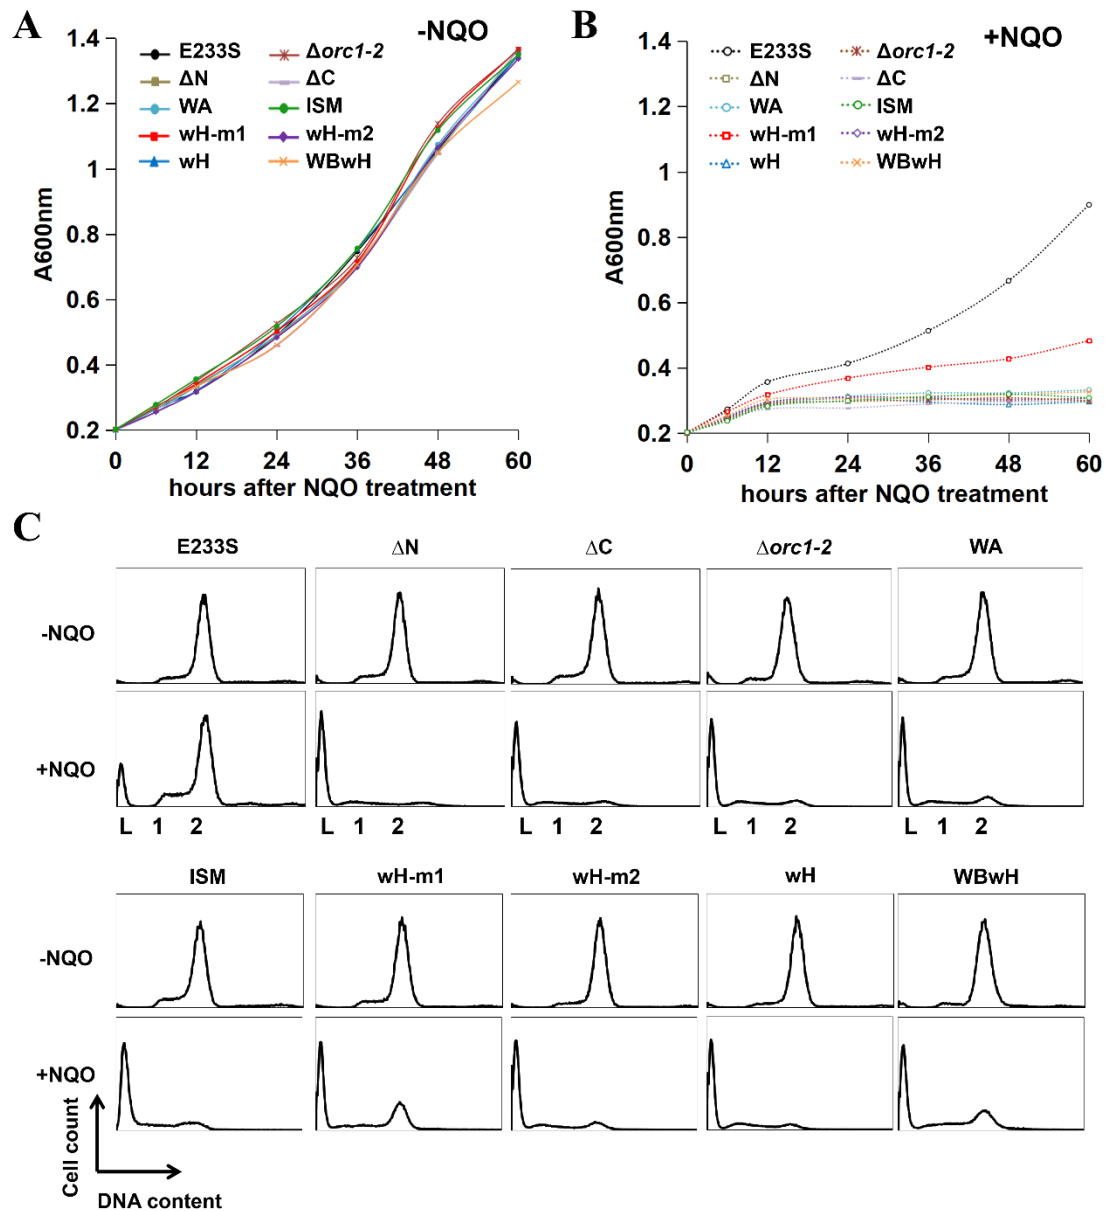

**Supplementary Figure S2. Physiological characterization of *orc1-2* mutants**

(A) and (B) Growth curves of *E233S* and *orc1-2* mutants. *Saccharolobus* cells were inoculated to SCV media in the absence (A) or presence (B) of 2  $\mu$ M NQO, and grown for 60 h. Culture growth was estimated by measuring A600 values of individual cultures during incubation, with obtained values plotted against the incubation time. (C) Flow cytometry profile of cell samples taken at 48 h after NQO addition. DNA contents were divided into 256 arbitrary points on the X-axis, and plotted against the cell counts (Y-axis). L: DNA-less cells; 1: cells containing one chromosome; 2: cells containing two chromosomes.

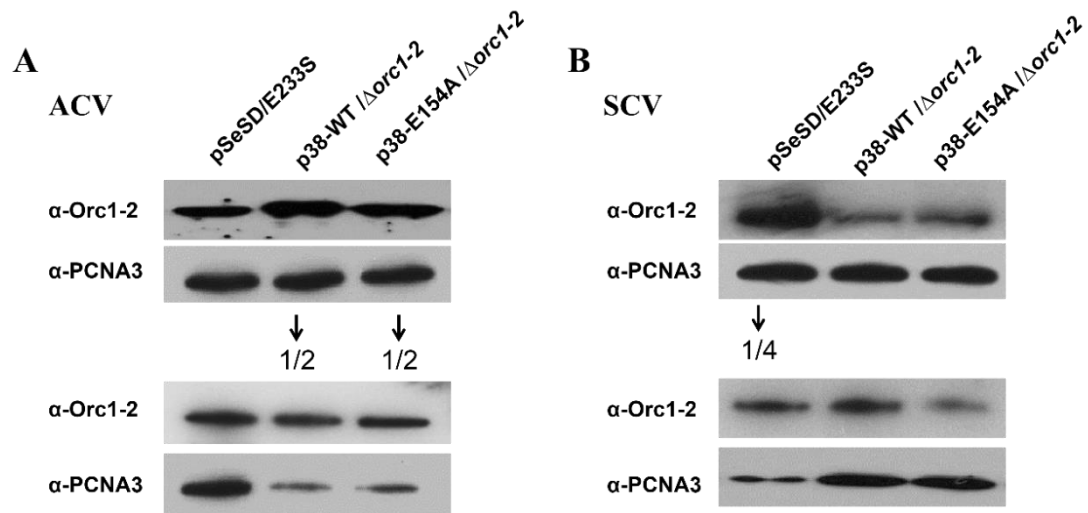

**Supplementary Figure S3. Semi-quantification of Orc1-2 protein expressed from *P<sub>ParaS-38</sub>* promoter**

*Saccharolobus* cells were grown in SCV or ACV medium. Cell mass was collected from which total proteins were prepared and used for western blot analysis. Some cell extract samples were also diluted for 2 (ACV) or 4 (SCV) folds before analysis. PCNA3 (one of the subunits of the replication clamp) was used as the loading reference.

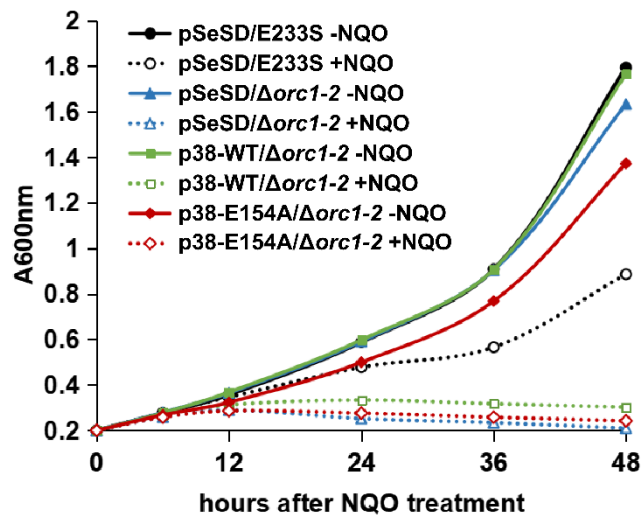

#### Supplementary Figure S4. Effects of E154A mutation on growth of *S. islandicus*

Cell growth was evaluated by determination of absorbance at 600nm. *Saccharolobus* cells were grown in SCV medium with or without 2  $\mu$ M NQO for 48 h during which cell samples were taken for monitoring their OD<sub>600</sub> values.

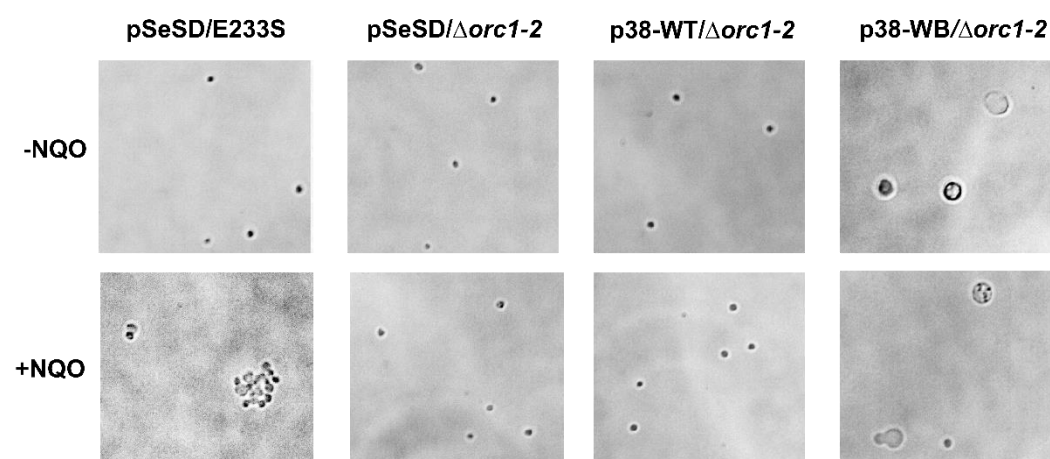

**Supplementary Figure S5. E154A mutation of Orc1-2 facilitates formation of anomalous cells of *S. islandicus*.**

*Saccharolobus* cells were grown in ACV medium with or without 2  $\mu$ M NQO for 12 hours. Fresh culture samples were directly observed under a microscope.

1. Deng, L.; Zhu, H.; Chen, Z.; Liang, Y. X.; She, Q., Unmarked gene deletion and host–vector system for the hyperthermophilic crenarchaeon *Sulfolobus islandicus*. *Extremophiles* **2009**, 13, (4), 735-746.
2. Samson, R. Y.; Xu, Y.; Gadelha, C.; Stone, T. A.; Faqiri, J. N.; Li, D.; Qin, N.; Pu, F.; Liang, Y. X.; She, Q., Specificity and function of archaeal DNA replication initiator proteins. *Cell reports* **2013**, 3, (2), 485-496.
3. Peng, W.; Feng, M.; Feng, X.; Liang, Y. X.; She, Q., An archaeal CRISPR type III-B system exhibiting distinctive RNA targeting features and mediating dual RNA and DNA interference. *Nucleic acids research* **2015**, 43, (1), 406-417.
4. Peng, N.; Deng, L.; Mei, Y.; Jiang, D.; Hu, Y.; Awayez, M.; Liang, Y.; She, Q., A synthetic arabinose-inducible promoter confers high levels of recombinant protein expression in hyperthermophilic archaeon *Sulfolobus islandicus*. *Applied and environmental microbiology* **2012**, 78, (16), 5630-5637.
5. Peng, N.; Xia, Q.; Chen, Z.; Liang, Y. X.; She, Q., An upstream activation element exerting differential transcriptional activation on an archaeal promoter. *Molecular microbiology* **2009**, 74, (4), 928-939.
